# Supplementary material
Source: HighWire-hosted journal article supplement (doi:10.1101/rna.079460.122)
Supplement: Supplemental_Fig_Legends.docx [file Supplemental_Fig_Legends.docx]

**Supplemental material**

Supplemental_Fig_S1 1H NMR Spectra of final dinucleotide cap analogue (**5**)

Supplemental_Fig_S2 31P NMR Spectra of final dinucleotide cap analogue (**5**)

Supplemental_Fig_S3 HRMS Spectra of final dinucleotide cap analogue (**5**)

Supplemental_Fig_S4 1HNMR Spectra of final dinucleotide cap analogue (**6**)

Supplemental_Fig_S5 31PNMR Spectra of final dinucleotide cap analogue (**6**) Supplemental_Fig_S6 HRMS Spectra of final dinucleotide cap analogue (**6**)

Supplemental_Fig_S7 Comparison of DSF thermal denaturation profiles of eIF4E in the presence of increasing concentrations of m7GpppG standard cap analogue and (4-bn-isx)2m7GpppG (**5**)

Supplemental_Fig_S8 Stabilization of eIF4E as a function of examined cap analogues concentration

Supplemental_Fig_S9 Comparison of sequences of T7 and SP6 polymerases.
